# Supplementary material for: Physiological and Biochemical Traits of Two Major Arabidopsis Accessions, Col-0 and Ws, Under Salinity
Source: Front Plant Sci. 2021 Jun 21;12:639154. doi: 10.3389/fpls.2021.639154 (PMC8256802; doi:10.3389/fpls.2021.639154)
Supplement: Supplementary Table 2 — Non-cellulosic monosaccharide composition of the cell wall (mole%) in Ws and Col-0 control and salt-treated plants. [file Table_2.XLSX]

## Sheet: Table S2
Mole %		Rha	Ara	Gal	Xyl	GalUA	Fuc	Glc	Man	GlcUA
Ws control	T48	7.7 ± 0.2 ab	12.2 ± 1.5 cd	14.0 ± 0.4 d	19.9 ± 5.9 bc	34.3 ± 8.1 abc	2.3 ± 0.1 abcd	5.8 ± 0.4 a	3.5 ± 1.0 abc	0.3 ± 0.1 bc
	T72	8.4 ± 0.1 a	12.1 ± 1.8 cd	13.7 ± 1.7 d	22.9 ± 1.7 ab	31.3 ± 2.5 bc	2.4 ± 0.1 abc	5.4 ± 0.8 a	3.5 ± 0.2 a	0.3 ± 0.1 bc
	T96	7.2 ± 0.1 b	12.1 ± 0.6 cd	13.0 ± 0.0 d	27.2 ± 2.0 a	26.4 ± 2.5 cd	2.3 ± 0.2 abc	5.4 ± 0.6 a	3.9 ± 0.4 a	0.5 ± 0.2 abc
Ws 150 mM NaCl	T48	7.4 ± 0.1 ab	11.3 ± 0.4 d	16.0 ± 0.7 c	20.5 ± 0.0 bc	34.1 ± 0.4 abc	1.8 ± 0.0 e	5.2 ± 0.1 a	3.3 ± 0.1 abcd	0.4 ± 0.1 abc
	T72	8.1 ± 0.7 ab	12.8 ± 0.2 cd	16.9 ± 3.5 c	22.4 ± 7.6 ab	29.6 ± 4.2 cd	2.0 ± 0.1 cde	5.1 ± 0.4 a	3.2 ± 0.9 abcde	0.3 ± 0.0 bc
	T96	8.0 ± 0.8 ab	15.3 ± 1.8 ab	17.0 ± 1.5 c	22.7 ± 1.8 ab	23.3 ± 2.9 d	1.9 ± 0.1 de	6.3 ± 1.1 a	3.6 ± 0.8 ab	0.6 ± 0.3 ab
Col-0 control	T48	8.7 ± 0.4 ab	12.5 ± 0.8 cd	17.6 ± 0.2 bc	13.5 ± 4.4 de	37.0 ± 3.4 ab	2.5 ± 0.2 a	5.3 ± 0.8 a	2.6 ± 0.0 bcde	0.3 ± 0.1 c
	T72	8.4 ± 1.0 ab	11.7 ± 2.2 cd	16.3 ± 2.4 c	13.2 ± 0.6 de	40.0 ± 7.3 a	2.2 ± 0.5 bcde	5.3 ± 1.1 a	2.5 ± 0.3 e	0.4 ± 0.1 abc
	T96	8,0 ± 1.0 ab	13.3 ± 0.8 c	18.3 ± 2.6 bc	15.3 ± 1.2 cd	34.7 ± 2.1 abc	2.7 ± 0.4 a	6.0 ± 0.5 a	2.1 ± 0.2 cde	0.4 ± 0.1 abc
Col-0 150 mM NaCl	T48	7.6 ± 0.0 a	13.7 ± 0.0 bc	20.4 ± 0.3 ab	12.9 ± 0.1 e	34.7 ± 0.2 ab	2.1 ± 0.0 bcde	5.3 ± 0.1 a	3.0 ± 0.2 abcde	0.4 ± 0.0 abc
	T72	7.3 ± 0.4 ab	15.9 ± 1.4 ab	24.0 ± 2.7 a	13.2 ± 1.5 de	28.9 ± 5.0 cd	2.2 ± 0.2 abcde	5.6 ± 0.5 a	2.7 ± 0.3 bcde	0.3 ± 0.1 bc
	T96	7.8 ± 1.1 ab	17.9 ± 2.5 a	20.1 ± 0.5 ab	13.4 ± 1.5 de	30.6 ± 4.6 bc	2.8 ± 0.6 a	7.1 ± 1.9 a	2.5 ± 0.4 de	0.5 ± 0.1 a
